# Supplementary material for: Cytotoxicity and preliminary mode of action studies of novel 2-aryl-4-thiopyrone-based organometallics
Source: Royal Society of Chemistry journal article supplement (doi:10.1039/c5dt02722e), 2015-12-02
Supplement: c5dt02722e1.pdf [file c5dt02722e1.pdf]

SUPPLEMENTARY INFORMATION

## Cytotoxicity and preliminary mode of action studies of novel 2-aryl-4-thiopyrone-based organometallics

Melanie Schmidlehner,<sup>[a]</sup> Lea S. Flocke,<sup>[a]</sup> Alexander Roller,<sup>[a]</sup> Michaela Hejl,<sup>[a]</sup> Michael A. Jakupec,<sup>[a,b]</sup>  
Wolfgang Kandioller,<sup>[a,b]</sup> and Bernhard K. Keppler,<sup>[a,b]</sup>

<sup>a</sup> Institute of Inorganic Chemistry, University of Vienna, Faculty of Chemistry, Waehringer Str. 42, A-1090 Vienna, Austria

<sup>b</sup> University of Vienna, Research Platform Translational Cancer Therapy Research, Waehringer Str. 42, A-1090 Vienna, Austria

### Table of Contents

|                                                        |    |
|--------------------------------------------------------|----|
| Syntheses of the ligands                               | 2  |
| Solubility determination                               | 5  |
| Overview of synthesized complexes                      | 5  |
| Crystallographic parameters                            | 6  |
| Crystal structures                                     | 8  |
| Stability <sup>1</sup> H NMR measurements of 7c and 8c | 10 |

## Syntheses of the ligands

### 2-Bromo-3-hydroxy-6-methyl-4H-pyran-4-one (2).

Allomaltol (1.00 g, 7.90 mmol) and ammonium acetate (0.07 g, 0.87 mmol) were dissolved in acetonitrile (50 mL), NBS (1.55 g, 8.70 mmol) was added and the reaction mixture was stirred for 4 hours at room temperature. The solvent was evaporated and the residue extracted with a mixture of water/dichloromethane. The organic layer was separated, dried over anhydrous Na<sub>2</sub>SO<sub>4</sub>, filtered and the solvent was removed under reduced pressure. The obtained solid was dried *in vacuo* and used without further purification for the next step. Yield 1.15 g, 5.61 mmol, 71%. <sup>1</sup>H NMR (DMSO-*d*<sub>6</sub>, 500.10 MHz, 25 °C): δ = 2.27 (s, 3 H, -CH<sub>3</sub>), 6.30 (s, 1 H, H<sub>5</sub>), 9.79 (br s, 1 H, -OH) ppm. <sup>13</sup>C NMR (DMSO-*d*<sub>6</sub>, 125.75 MHz, 25 °C): 172.25 (C<sub>4</sub>), 166.2 (C<sub>6</sub>), 143.8 (C<sub>3</sub>), 128.9 (C<sub>2</sub>), 111.6 (C<sub>5</sub>), 19.0 (C<sub>7</sub>). Elemental anal. calc for C<sub>6</sub>H<sub>5</sub>BrO<sub>3</sub>: C, 35.15; H, 2.45; Found: C, 34.79; H, 2.27 %. ESI-MS<sup>+</sup> m/z: 204.8 [M-H]<sup>+</sup>.

**3-(Benzyloxy)-2-bromo-6-methyl-4H-pyran-4-one (3).** Bromoallomaltol **2** (1.25 g, 6.10 mmol) was dissolved in dichloromethane (20 mL). Benzylbromide (0.94 mL, 7.91 mmol) and 18-crown-6 ether (0.11 mg, 0.42 mmol), dissolved in dichloromethane (10 mL) were added. KOH solution (15%, 10 mL) was added and the mixture was vigorously stirred overnight. The phases were separated, the water phase was extracted with dichloromethane, the organic layers were combined, dried over anhydrous Na<sub>2</sub>SO<sub>4</sub>, filtered and the solvent was removed under reduced pressure. Purification by column chromatography (*n*-hexane/ethyl acetate = 1/1) yielded the product as yellow oil. Yield: 1.21 g, 4.09 mmol, 62%. <sup>1</sup>H NMR (DMSO-*d*<sub>6</sub>, 500.10 MHz, 25 °C): δ = 2.27 (s, 3 H, -CH<sub>3</sub>), 5.10 (s, 2 H, -OCH<sub>2</sub>-), 6.35 (s, 1 H, H<sub>5</sub>), 7.32 – 7.44 (m, 5 H, -C<sub>6</sub>H<sub>5</sub>) ppm. <sup>13</sup>C NMR (DMSO-*d*<sub>6</sub>, 125.75 MHz, 25 °C): 173.4 (C<sub>4</sub>), 166.4 (C<sub>6</sub>), 144.0 (C<sub>3</sub>), 139.6 (C<sub>Ar</sub>), 136.3 (C<sub>2</sub>), 128.5 (C<sub>Ar</sub>), 128.27 (C<sub>Ar</sub>), 114.2 (C<sub>5</sub>), 73.1 (-OCH<sub>2</sub>-), 18.7 (C<sub>7</sub>) ppm. HR-ESI-MS<sup>+</sup> m/z calc.: 295.1286; found: 294.9963 [M-H]<sup>+</sup>.

### General procedure for Suzuki-Miyaura coupling reactions.

Benzylated bromoallomaltol **3** (1.50 g, 5.08 mmol, 1 eq), phenylboronic acid (6.10 mmol, 1.20 eq.) and potassium phosphate (4.00 g, 15.20 mmol, 3 eq.) were dissolved in acetonitrile/water (2:1, 40 mL). Tetrakis(triphenylphosphine)palladium(0) (10 mol%) was added and the mixture was stirred overnight at 75 °C under an argon atmosphere. After cooling to room temperature, the phases were separated, the water phase was extracted with acetonitrile, the combined organic layers were dried over anhydrous Na<sub>2</sub>SO<sub>4</sub>, filtered and the solvent was removed under reduced pressure. Purification by column chromatography (*n*-hexane/ethyl acetate = 1/1) yielded the respective product.

### 3-(Benzyloxy)-6-methyl-2-phenyl-4H-pyran-4-one (4a).

The synthesis was performed according to the general procedure using phenylboronic acid (0.85 g). Yield: 1.28 g, 4.38 mmol, 86%. <sup>1</sup>H NMR (DMSO-*d*<sub>6</sub>, 500.10 MHz, 25 °C): δ = 2.34 (s, 3 H, -CH<sub>3</sub>), 5.08 (s, 2 H, -OCH<sub>2</sub>-), 6.34 (s, 1 H, H<sub>5</sub>), 7.27 (br s, 5 H, -C<sub>6</sub>H<sub>5</sub>), 7.29 – 7.34 (m, 2 H, H<sub>Ar</sub>), 7.85 – 7.90 (m, 2 H, H<sub>Ar</sub>) ppm. <sup>13</sup>C NMR (DMSO-*d*<sub>6</sub>, 125.75 MHz, 25 °C): δ = 175.4 (C<sub>4</sub>), 165.0 (C<sub>6</sub>), 155.0 (C<sub>2</sub>), 142.2 (C<sub>3</sub>), 136.7 (C<sub>Ar</sub>), 130.3 (C<sub>4'</sub>), 130.1 (C<sub>1'</sub>), 128.4 (C<sub>2'</sub>, C<sub>6'</sub>), 128.3 (C<sub>Ar</sub>), 128.1 (C<sub>Ar</sub>), 128.0 (C<sub>Ar</sub>), 127.9 (C<sub>3'</sub>, C<sub>5'</sub>), 113.9 (C<sub>5</sub>), 72.6 (-OCH<sub>2</sub>-), 19.1 (C<sub>7</sub>) ppm. ESI-MS<sup>+</sup> m/z: 315.31 [M+Na]<sup>+</sup>.

### 3-(Benzyloxy)-2-(4-fluorophenyl)-6-methyl-4H-pyran-4-one (4b).

The synthesis was performed according to the general procedure using 4-fluorophenylboronic acid (0.74 g). Yield: 1.32 g, 4.57 mmol, 84%. <sup>1</sup>H NMR (DMSO-*d*<sub>6</sub>, 500.10 MHz, 25 °C): δ = 2.33 (s, 3 H, -CH<sub>3</sub>), 5.08 (s, 2 H, -OCH<sub>2</sub>-), 6.34 (s, 1 H, H<sub>5</sub>), 7.28 (br s, 5 H, -C<sub>6</sub>H<sub>5</sub>), 7.28 – 7.34 (m, 2 H, H<sub>Ar</sub>), 7.85 – 7.89 (m, 2 H, H<sub>Ar</sub>) ppm. <sup>13</sup>C NMR (DMSO-*d*<sub>6</sub>, 125.75 MHz, 25 °C): δ = 175.3 (C<sub>4</sub>), 165.0 (C<sub>6</sub>), 162.9 (d, <sup>1</sup>J<sub>C,F</sub> = 249 Hz, C<sub>4'</sub>), 154.1 (C<sub>2</sub>), 141.9 (C<sub>3</sub>), 136.5 (C<sub>Ar</sub>), 130.5 (d, <sup>3</sup>J<sub>C,F</sub> = 8 Hz, C<sub>2'</sub>, C<sub>6'</sub>), 128.4 (C<sub>Ar</sub>), 128.1 (C<sub>Ar</sub>), 128.0 (C<sub>Ar</sub>), 126.6 (d, <sup>4</sup>J<sub>C,F</sub> = 3 Hz, C<sub>1'</sub>), 115.4 (d, <sup>2</sup>J<sub>C,F</sub> = 22 Hz, C<sub>3'</sub>, C<sub>5'</sub>), 113.9 (C<sub>5</sub>), 72.6 (-OCH<sub>2</sub>-), 19.0 (C<sub>7</sub>) ppm. ESI-MS<sup>+</sup> m/z: 333.29 [M+Na]<sup>+</sup>.

### 3-(Benzyloxy)-6-methyl-2-(*p*-tolyl)-4H-pyran-4-one (4c).

The synthesis was performed according to the general procedure using 4-methylphenylboronic acid (0.83 g). Yield: 1.23 g, 4.03 mmol, 79%. <sup>1</sup>H NMR (DMSO-*d*<sub>6</sub>, 500.10 MHz, 25 °C): δ = 2.33 (s, 3 H, -CH<sub>3</sub>), 2.36 (s, 3 H, -CH<sub>3</sub>) 5.06 (s, 2 H, -OCH<sub>2</sub>-), 6.32 (s, 1 H, H<sub>5</sub>), 7.26 – 7.31 (m, 7 H, -C<sub>6</sub>H<sub>5</sub>, H<sub>Ar</sub>), 7.73 – 7.76 (m, 2 H, H<sub>Ar</sub>) ppm. <sup>13</sup>C NMR (DMSO-*d*<sub>6</sub>, 125.75 MHz, 25 °C): δ = 175.4 (C4), 164.9 (C6), 155.0 (C2), 142.0 (C3), 140.3 (C4'), 136.7 (C<sub>Ar</sub>), 129.0 (C3', C5'), 128.3 (C<sub>Ar</sub>), 128.2 (C<sub>Ar</sub>), 128.0 (C<sub>Ar</sub>), 127.8 (C2', C6'), 127.3 (C1'), 113.8 (C5), 72.5 (-OCH<sub>2</sub>-), 21.0 (-CH<sub>3</sub>), 19.1 (C7) ppm. ESI-MS<sup>+</sup> m/z: 307.29 [M+H]<sup>+</sup>, 329.27 [M+Na]<sup>+</sup>

### 3-(Benzyloxy)-6-methyl-2-(4-methoxyphenyl)-4H-pyran-4-one (4d).

The synthesis was performed according to the general procedure using 4-methoxyphenylboronic acid (0.93 g). Yield: 1.40 g, 4.33 mmol, 85%. <sup>1</sup>H NMR (DMSO-*d*<sub>6</sub>, 500.10 MHz, 25 °C): δ = 2.33 (s, 3 H, -CH<sub>3</sub>), 3.82 (s, 3 H, -OCH<sub>3</sub>) 5.06 (s, 2 H, -OCH<sub>2</sub>-), 6.30 (s, 1 H, H<sub>5</sub>), 7.03 (d, 2 H, <sup>3</sup>J<sub>H,H</sub> = 8 Hz, H<sub>Ar</sub>), 7.30 (br s, 5 H, -C<sub>6</sub>H<sub>5</sub>), 7.83 (d, 2 H, <sup>3</sup>J<sub>H,H</sub> = 8 Hz, H<sub>Ar</sub>) ppm. <sup>13</sup>C NMR (DMSO-*d*<sub>6</sub>, 125.75 MHz, 25 °C): δ = 175.3 (C4), 164.6 (C6), 160.7 (C4'), 154.9 (C2), 141.4 (C3), 136.7 (C<sub>Ar</sub>), 128.2 (C<sub>Ar</sub>), 128.1 (C<sub>Ar</sub>), 128.0 (C<sub>Ar</sub>), 129.5 (C2', C6'), 122.3 (C1'), 113.8 (C5), 113.7 (C3', C5'), 72.4 (-OCH<sub>2</sub>-), 55.3 (-OCH<sub>3</sub>), 19.0 (C7) ppm. ESI-MS<sup>+</sup> m/z: 323.36 [M+H]<sup>+</sup>, 345.31 [M+Na]<sup>+</sup>.

### General procedure for cleavage of the benzyl group.

The respective protected pyrone **4a–d** (4.00 mmol) was suspended in acetic acid (10 mL), HCl conc. (15 mL) was slowly added and the mixture was refluxed for 3 hours. If not other stated, the solvent was removed after cooling to room temperature, the residue suspended in acetone, filtered, washed with acetone and dried *in vacuo*.

### 3-Hydroxy-6-methyl-2-phenyl-4H-pyran-4-one (5a).

The synthesis was performed according to the general procedure using 3-(benzyloxy)-6-methyl-2-phenyl-4H-pyran-4-one **4a** (1.17 g, 4.00 mmol). The solvent was removed and the residue was taken up in 20 mL dichloromethane and washed with water (3x 20 mL). The organic phase was separated, dried over anhydrous Na<sub>2</sub>SO<sub>4</sub>, filtered and the solvent was evaporated. Yield: 0.86 g, 3.92 mmol, 98%. <sup>1</sup>H NMR (DMSO-*d*<sub>6</sub>, 500.10 MHz, 25 °C): δ = 2.37 (s, 3 H, -CH<sub>3</sub>), 6.33 (s, 1 H, H<sub>5</sub>), 7.42 – 7.46 (m, 1 H, H<sub>Ar</sub>), 7.49 – 7.53 (m, 2 H, H<sub>Ar</sub>), 8.00 – 8.03 (m, 2 H, H<sub>Ar</sub>) 9.41 (br s, 1 H, -OH) ppm. <sup>13</sup>C NMR (DMSO-*d*<sub>6</sub>, 125.75 MHz, 25 °C): δ = 174.1 (C4), 164.9 (C6), 144.3 (C2), 141.9 (C3), 131.0 (C1'), 129.2 (C4'), 128.4 (C2', C6'), 126.72 (C3', C5'), 110.4 (C5), 19.3 (C7) ppm. HR-ESI-MS<sup>+</sup> m/z calc. 202.0630; found: 203.0702 [M+H]<sup>+</sup>, 225.0521 [M+Na]<sup>+</sup>.

### 3-Hydroxy-2-(4-fluorophenyl)-6-methyl-4H-pyran-4-one (5b).

The synthesis was performed according to the general procedure using 3-(benzyloxy)-2-(4-fluorophenyl)-6-methyl-4H-pyran-4-one **4b** (1.14 g, 4.00 mmol). Yield: 0.81 g, 3.69 mmol, 92%. <sup>1</sup>H NMR (DMSO-*d*<sub>6</sub>, 500.10 MHz, 25 °C): δ = 2.37 (s, 3 H, -CH<sub>3</sub>), 6.32 (s, 1 H, H<sub>5</sub>), 7.33 – 7.38 (m, 2 H, H<sub>Ar</sub>), 8.04 – 8.09 (m, 2 H, H<sub>Ar</sub>) 9.50 (br s, 1 H, -OH) ppm. <sup>13</sup>C NMR (DMSO-*d*<sub>6</sub>, 125.75 MHz, 25 °C): δ = 174.0 (C4), 164.8 (C6), 162.2 (d, <sup>1</sup>J<sub>C,F</sub> = 248 Hz, C4'), 143.6 (C2), 141.7 (C3), 129.1 (d, <sup>3</sup>J<sub>C,F</sub> = 8 Hz, C2', C6'), 127.5 (d, <sup>4</sup>J<sub>C,F</sub> = 3 Hz, C1'), 115.5 (d, <sup>2</sup>J<sub>C,F</sub> = 22 Hz, C3', C5'), 110.4 (C5), 19.3 (C7) ppm. HR-ESI-MS<sup>+</sup> m/z calc.: 220.0536; found: 221.0607 [M+H]<sup>+</sup>, 243.0427 [M+Na]<sup>+</sup>.

### 3-Hydroxy-6-methyl-2-(*p*-tolyl)-4H-pyran-4-one (5c).

The synthesis was performed according to the general procedure utilizing 3-(benzyloxy)-6-methyl-2-(*p*-tolyl)-4H-pyran-4-one **4c** (1.23 g, 4.00 mmol). The solvent was removed and the product was taken up in 20 mL dichloromethane and washed with water (3x 20 mL). The organic phase was separated, dried over anhydrous Na<sub>2</sub>SO<sub>4</sub>, filtered and the solvent was evaporated. Yield: 0.85 g, 3.92 mmol, 98%. <sup>1</sup>H NMR (DMSO-*d*<sub>6</sub>, 500.10 MHz, 25 °C): δ = 2.36 (s, 3 H, -CH<sub>3</sub>), 2.36 (s, 3 H, -CH<sub>3</sub>), 6.30 (s, 1 H, H<sub>5</sub>), 7.31 (d, 2 H, <sup>3</sup>J<sub>H,H</sub> = 8 Hz, H<sub>Ar</sub>), 7.91 (d, 2 H, <sup>3</sup>J<sub>H,H</sub> = 8 Hz, H<sub>Ar</sub>), 9.33 (br s, 1 H, -OH) ppm. <sup>13</sup>C NMR (DMSO-*d*<sub>6</sub>, 125.75 MHz, 25 °C): δ = 174.0 (C4), 164.7 (C6), 144.6 (C2), 141.5 (C3), 139.0 (C4'), 129.1 (C3', C5'), 128.2 (C1'), 126.7 (C2', C6'), 110.4 (C5), 20.9 (-CH<sub>3</sub>), 19.3 (C7) ppm. HR-ESI-MS<sup>+</sup> m/z calc.: 216.0786; found: 217.0857 [M+H]<sup>+</sup>, 239.0676 [M+Na]<sup>+</sup>.

### 3-Hydroxy-2-(4-methoxyphenyl)-6-methyl-4H-pyran-4-one (5d).

The synthesis was performed according to the general procedure utilizing 3-(benzyloxy)-6-methyl-2-(4-methoxyphenyl)-4H-pyran-4-one **4d** (1.29 g, 4.00 mmol). Yield: 0.90 g, 3.88 mmol, 97%. <sup>1</sup>H NMR (DMSO-*d*<sub>6</sub>, 500.10 MHz, 25 °C): δ = 2.35 (s, 3 H, -CH<sub>3</sub>), 3.82 (s, 3 H, -OCH<sub>3</sub>), 6.28 (s, 1 H, H<sub>5</sub>), 7.07 (d, 2 H, <sup>3</sup>J<sub>H,H</sub> = 8 Hz, H<sub>Ar</sub>), 7.97 (d, 2 H, <sup>3</sup>J<sub>H,H</sub> = 8 Hz, H<sub>Ar</sub>), 9.21 (br s, 1 H, -OH) ppm. <sup>13</sup>C NMR (DMSO-*d*<sub>6</sub>, 125.75 MHz, 25 °C): δ = 173.9 (C4), 164.4 (C6), 159.9 (C4'), 144.8 (C2), 141.0 (C3), 128.4 (C2', C6'), 123.4 (C1'), 114.0 (C3', C5'), 110.3 (C5), 55.3 (-OCH<sub>3</sub>), 19.3 (C7) ppm. HR-ESI-MS<sup>+</sup> m/z calc.: 232.0736; found: 233.0808 [M+H]<sup>+</sup>.

### General synthesis for the thiopyrones

Pyronone **5a–d** (5.00 mmol, 1 eq) and Lawesson's reagent (1.01 g, 2.49 mmol, 1 eq) were suspended in dry THF (30 mL, dried over molecular sieves 3 Å) and were refluxed under inert conditions for 6 hours. The solvent was removed and the pure product was obtained by recrystallization from ethanol.

### 3-Hydroxy-6-methyl-2-phenyl-4H-pyran-4-thione (6a).

The synthesis was performed according to the general procedure utilizing 3-hydroxy-6-methyl-2-phenyl-4H-pyran-4-one **5a** (1.01 g, 5.00 mmol). Yield: 0.57 g, 2.61 mmol, 52%. <sup>1</sup>H NMR (DMSO-*d*<sub>6</sub>, 500.10 MHz, 25 °C): δ = 2.45 (s, 3 H, -CH<sub>3</sub>), 7.41 (s, 1 H, H<sub>5</sub>), 7.51 – 7.59 (m, 3 H, H<sub>Ar</sub>), 8.10 – 8.13 (m, 2 H, H<sub>Ar</sub>) 8.83 (br s, 1 H, -OH) ppm. <sup>13</sup>C NMR (DMSO-*d*<sub>6</sub>, 125.75 MHz, 25 °C): δ = 187.2 (C4), 159.5 (C6), 147.3 (C3), 141.6 (C2), 130.4 (C4'), 130.1 (C1'), 128.8 (C3', C5'), 127.6 (C2', C6'), 122.4 (C5), 18.7 (C7) ppm. Elemental anal. calc for C<sub>12</sub>H<sub>10</sub>O<sub>2</sub>S: C, 66.03; H, 4.62; S, 14.69; Found: C, 65.74; H, 4.67; S, 14.66 %. ESI-MS<sup>+</sup> m/z: 218.96 [M+H]<sup>+</sup>.

### 3-Hydroxy-2-(4-fluorophenyl)-6-methyl-4H-pyran-4-thione (6b).

The synthesis was performed according to the general procedure utilizing 3-hydroxy-2-(4-fluorophenyl)-6-methyl-4H-pyran-4-one **5b** (1.10 g, 5.00 mmol). Yield: 0.78 g, 3.30 mmol, 66%. <sup>1</sup>H NMR (DMSO-*d*<sub>6</sub>, 500.10 MHz, 25 °C): δ = 2.44 (s, 3 H, -CH<sub>3</sub>), 7.39 – 7.45 (m, 3 H, H<sub>Ar</sub>, H<sub>5</sub>), 8.15 – 8.20 (m, 2 H, H<sub>Ar</sub>) 8.86 (s, 1 H, -OH) ppm. <sup>13</sup>C NMR (DMSO-*d*<sub>6</sub>, 125.75 MHz, 25 °C): δ = 187.6 (C4), 162.9 (d, <sup>1</sup>J<sub>C,F</sub> = 250 Hz, C4'), 159.4 (C6), 147.1 (C3), 141.0 (C2), 130.2 (d, <sup>3</sup>J<sub>C,F</sub> = 9 Hz, C2', C6), 126.6 (d, <sup>4</sup>J<sub>C,F</sub> = 3 Hz, C1'), 122.4 (C5), 115.9 (d, <sup>2</sup>J<sub>C,F</sub> = 22 Hz, C3', C5'), 18.7 (C7) ppm. Elemental anal. calc for C<sub>12</sub>H<sub>9</sub>FO<sub>2</sub>S: C, 61.00; H, 3.84; S, 13.57 Found: C, 61.09; H, 3.76; S, 13.50 %. ESI-MS<sup>+</sup> m/z: 236.93 [M+H]<sup>+</sup>.

### 3-Hydroxy-6-methyl-2-(*p*-tolyl)-4H-pyran-4-thione (6c).

The synthesis was performed according to the general procedure utilizing 3-hydroxy-6-methyl-2-(*p*-tolyl)-4H-pyran-4-one **5c** (1.08 g, 5.00 mmol). Yield: 0.91 g, 3.90 mmol, 78%. <sup>1</sup>H NMR (DMSO-*d*<sub>6</sub>, 500.10 MHz, 25 °C): δ = 2.38 (s, 3 H, -CH<sub>3</sub>), 2.44 (s, 3 H, -CH<sub>3</sub>), 7.36 – 7.40 (m, 3 H, H<sub>5</sub>, H<sub>Ar</sub>) 8.02 (d, 2 H, <sup>3</sup>J<sub>H,H</sub> = 8 Hz, H<sub>Ar</sub>), 8.79 (br s, 1 H, -OH) ppm. <sup>13</sup>C NMR (DMSO-*d*<sub>6</sub>, 125.75 MHz, 25 °C): δ = 186.7 (C4), 159.2 (C6), 147.1 (C3), 142.0 (C2), 140.5 (C4'), 129.4 (C3', C5'), 127.5 (C2', C6'), 127.2 (C1'), 122.1. (C5), 21.1 (-CH<sub>3</sub>), 18.7 (C7) ppm. Elemental anal. calc for C<sub>13</sub>H<sub>12</sub>O<sub>2</sub>S: C, 67.21; H, 5.21; S, 13.80 Found: C, 67.10; H, 5.31; S, 13.74 %. HR-ESI-MS<sup>+</sup> m/z calc.: 232.0558; found: 233.0625 [M+H]<sup>+</sup>, 255.0445 [M+Na]<sup>+</sup>.

### 3-Hydroxy-2-(4-methoxyphenyl)-6-methyl-4H-pyran-4-thione (6d).

The synthesis was performed according to the general procedure utilizing 3-hydroxy-6-methyl-2-(4-methoxyphenyl)-4H-pyran-4-one **5d** (1.16 g, 5.00 mmol). Yield: 1.07 g, 4.30 mmol, 86%. <sup>1</sup>H NMR (DMSO-*d*<sub>6</sub>, 500.10 MHz, 25 °C): δ = 2.43 (s, 3 H, -CH<sub>3</sub>), 3.84 (s, 3 H, -OCH<sub>3</sub>), 7.12 (d, 2 H, <sup>3</sup>J<sub>H,H</sub> = 8 Hz, H<sub>Ar</sub>), 7.35 (s, 1 H, H<sub>5</sub>), 8.08 (d, 2 H, <sup>3</sup>J<sub>H,H</sub> = 8 Hz, H<sub>Ar</sub>), 8.75 (br s, 1 H, -OH) ppm. <sup>13</sup>C NMR (DMSO-*d*<sub>6</sub>, 125.75 MHz, 25 °C): δ = 186.0 (C4), 160.9 (C6), 158.9 (C4'), 146.6 (C3), 142.2 (C2), 129.4 (C2', C6'), 122.2 (C1'), 121.8 (C5), 114.3 (C3', C5'), 55.4 (-OCH<sub>3</sub>), 18.7 (C7) ppm. Elemental anal. calc for C<sub>13</sub>H<sub>12</sub>O<sub>3</sub>S·0.1H<sub>2</sub>O: C, 62.43; H, 4.92; S, 12.82 Found: C, 62.46; H, 4.90; S, 12.84 %. ESI-MS<sup>+</sup> m/z: 248.97 [M+H]<sup>+</sup>.

## Solubility determination

The solubility of all ligands and complexes was determined in 1% v/v DMSO/H<sub>2</sub>O. A stock solution in DMSO was prepared and diluted with water to an overall concentration of 1% v/v DMSO. The solubility refers to the highest concentration of compound without observation of precipitation for at least 18 h. Same solubilities were observed for the system 1% v/v DMSO/PBS

## Overview of synthesized complexes

**Table S1:** Overview of synthesized complexes with corresponding yields.

|    | metal | -R                | yield |
|----|-------|-------------------|-------|
| 7a | Ru    | -H                | 66%   |
| 7b | Ru    | -F                | 62%   |
| 7c | Ru    | -CH <sub>3</sub>  | 64%   |
| 7d | Ru    | -OCH <sub>3</sub> | 67%   |
| 8a | Rh    | -H                | 71%   |
| 8b | Rh    | -F                | 66%   |
| 8c | Rh    | -CH <sub>3</sub>  | 66%   |
| 8d | Rh    | -OCH <sub>3</sub> | 68%   |

## Crystallographic parameters

**Table S2.** Crystallographic parameters for structures **6c** and **8b**.

|                                                     | <b>6c</b>                                        | <b>8b</b>                                             |
|-----------------------------------------------------|--------------------------------------------------|-------------------------------------------------------|
| Empirical formula                                   | C <sub>13</sub> H <sub>12</sub> O <sub>2</sub> S | C <sub>22</sub> H <sub>23</sub> ClFO <sub>2</sub> RhS |
| Formula weight [g/mol]                              | 232.06                                           | 508.82                                                |
| Temperature/K                                       | 100(2)                                           | 90(2)                                                 |
| Wavelength/Å                                        | 0.71073                                          | 0.71073                                               |
| Crystal size/mm                                     | 0.016x0.136x0.255                                | 0.009x0.039x0.223                                     |
| Crystal system                                      | monoclinic                                       | orthorhombic                                          |
| Space group                                         | <i>P</i> 2 <sub>1</sub> / <i>c</i>               | <i>P</i> 2 <sub>1</sub> 2 <sub>1</sub> 2 <sub>1</sub> |
| <i>a</i> [Å]                                        | 11.1036(4)                                       | 8.0870(5)                                             |
| <i>b</i> [Å]                                        | 6.9087(2)                                        | 8.4811(4)                                             |
| <i>c</i> [Å]                                        | 14.7366(5)                                       | 30.4205(17)                                           |
| $\alpha$ [deg]                                      | 90                                               | 90                                                    |
| $\beta$ [deg]                                       | 101.072(13)                                      | 90                                                    |
| $\gamma$ [deg]                                      | 90                                               | 90                                                    |
| Volume [Å <sup>3</sup> ]                            | 1109.42(6)                                       | 2086.4(2)                                             |
| <i>Z</i>                                            | 4                                                | 4                                                     |
| Calculated density/mg/m <sup>3</sup>                | 1.391                                            | 1.62                                                  |
| Absorption coefficient/mm <sup>-1</sup>             | 0.272                                            | 1.071                                                 |
| <i>F</i> (000)                                      | 488                                              | 1032                                                  |
| $\Theta$ range for data collection[°]               | 1.78–30.09                                       | 1.34–25.45                                            |
| Index ranges                                        | -15 ≤ <i>h</i> ≤ 15                              | -9 ≤ <i>h</i> ≤ 9                                     |
|                                                     | -9 ≤ <i>k</i> ≤ 9                                | -10 ≤ <i>k</i> ≤ 10                                   |
|                                                     | -20 ≤ <i>l</i> ≤ 20                              | -36 ≤ <i>l</i> ≤ 36                                   |
| Reflections collected/unique                        | 52010/3261                                       | 67109/3862                                            |
| Data/restraints/parameters                          | 3261/0/151                                       | 3862/6/332                                            |
| <i>R</i> (Int)                                      | 0.0443                                           | 0.0616                                                |
| Final <i>R</i> indices [ <i>I</i> > 2σ( <i>I</i> )] | 2854                                             | 3473                                                  |
| <i>R</i> <sub>1</sub> <sup>a</sup>                  | 0.0331                                           | 0.0254                                                |
| <i>wR</i> <sub>2</sub> <sup>b</sup>                 | 0.0965                                           | 0.0553                                                |
| GOF <sup>c</sup>                                    | 1.038                                            | 1.093                                                 |

<sup>a</sup>  $R_1 = \sum ||F_o| - |F_c|| / \sum |F_o|$ .

<sup>b</sup>  $wR_2 = \{\sum [w(F_o^2 - F_c^2)^2] / \sum [w(F_o^2)^2]\}^{1/2}$ .

<sup>c</sup>  $GOF = \{\sum [w(F_o^2 - F_c^2)^2] / (n - p)\}^{1/2}$ , where *n* is the number of reflections and *p* is the total number of parameters refined.

**Table S3.** Selected bond lengths for structures **7c**, **7d**, **8b** and **8d**.

| bond      | <b>7c</b> | <b>7d</b>  | <b>8b</b>  | <b>8d</b>  |
|-----------|-----------|------------|------------|------------|
| M1-S1     | 2.3560(8) | 2.3537(6)  | 2.3517(13) | 2.3619(5)  |
| M1-O2     | 2.082(2)  | 2.0904(15) | 2.085(3)   | 2.0765(12) |
| M1-Cl1    | 2.4140(7) | 2.6164(6)  | 2.359(16)  | 2.4288(4)  |
| M1-Ar     | 2.183(3)  | 2.179(2)   | 2.143(11)  | 2.1486(18) |
| S1-M1-O2  | 82.17(6)  | 82.15(5)   | 82.71(9)   | 82.72(4)   |
| S1-M1-Cl1 | 88.02(3)  | 86.82(2)   | 84.1(9)    | 88.531(16) |
| O2-M1-Cl1 | 86.31(6)  | 85.14(5)   | 79.2(11)   | 86.18(4)   |

## Crystal structures

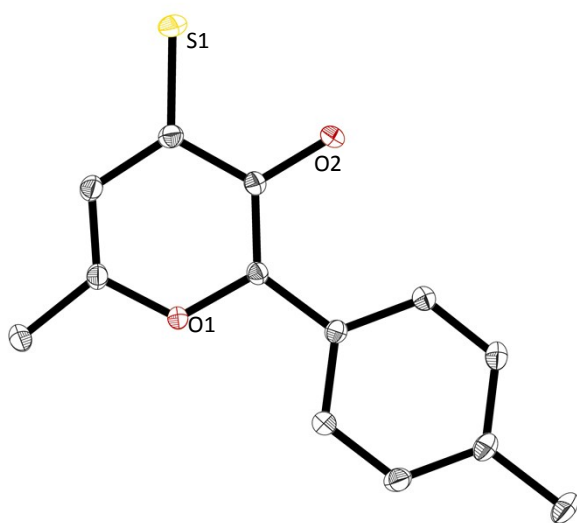

**Figure S1:** Molecular structure of **6c** drawn at 50% probability level.



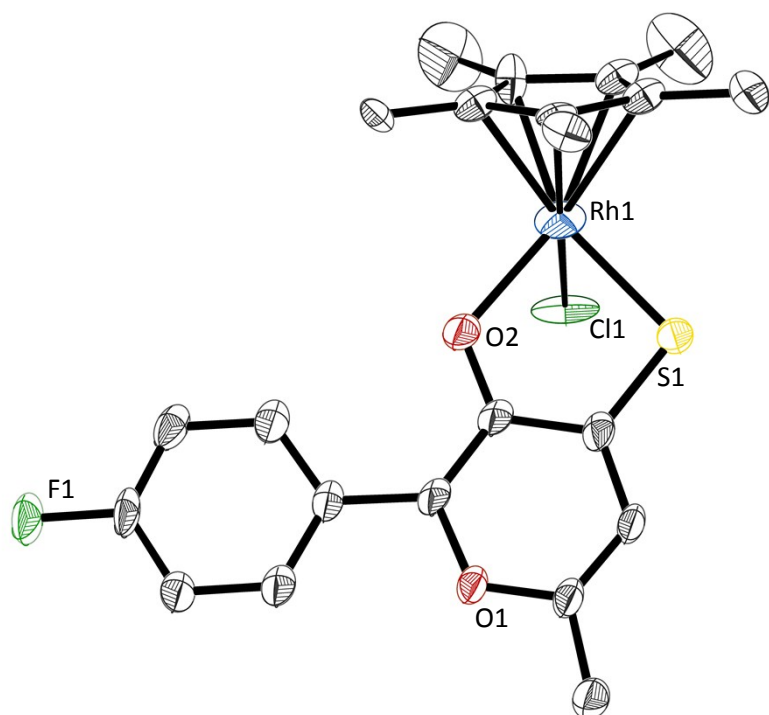

**Figure S2:** Molecular structure of **8b** drawn at 50% probability level.

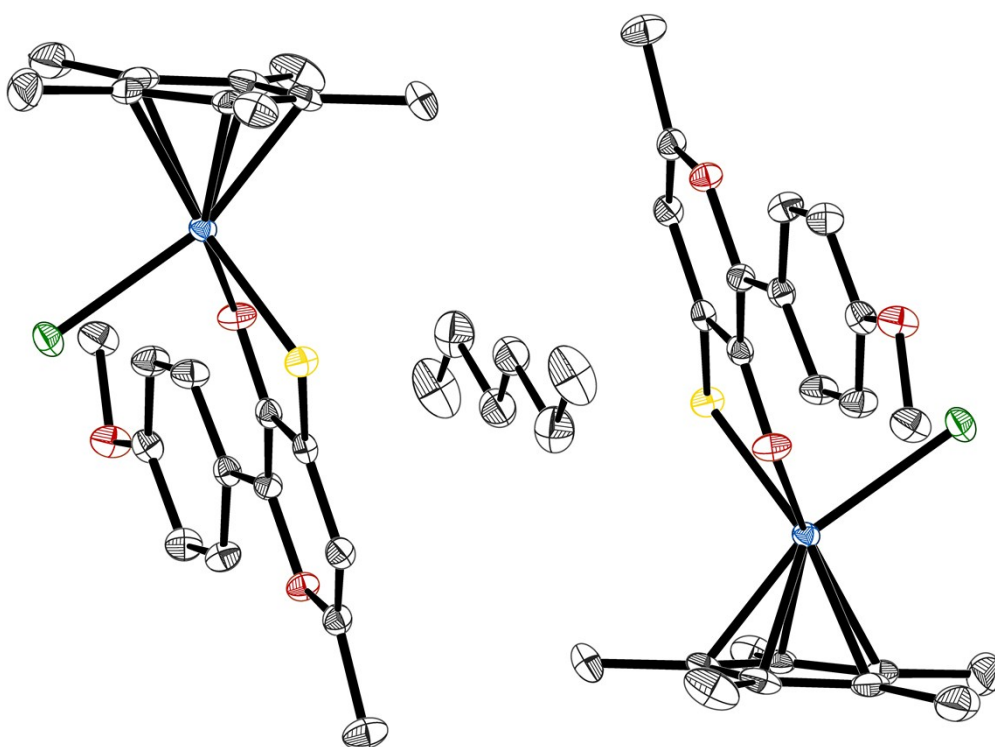

**Figure S3:** Molecular structure of **8d** drawn at 50% probability level.

## Stability $^1\text{H}$ NMR measurements of **7c**

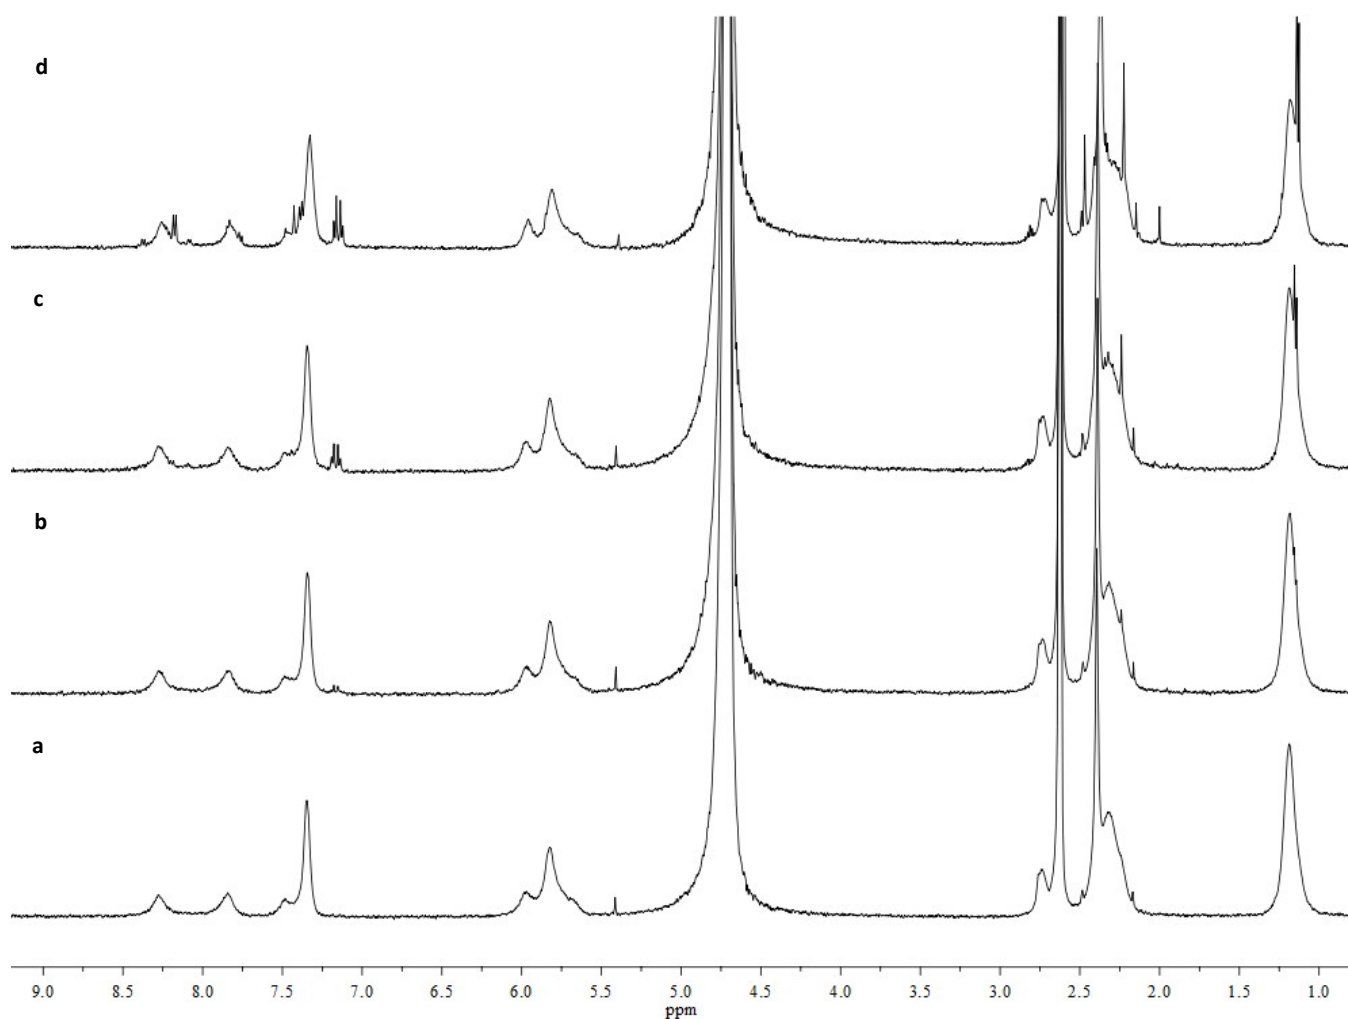

**Figure S3.** Full  $^1\text{H}$  NMR spectra of **7c** in  $\text{D}_2\text{O}$  after **a)** 5 minutes, **b)** 5 hours, **c)** 24 hours and **d)** 7 days.  $^1\text{H}$  NMR ( $\text{D}_2\text{O}$ , 500.10 MHz, 25  $^\circ\text{C}$ ):  $\delta$  = 1.23 (br s, 6 H,  $-\text{CH}_{3\text{cym-f}}$ ), 2.38 (br s, 6 H,  $-\text{CH}_3$ ), 2.45 (s, 3 H,  $-\text{CH}_3$ ), 2.78 (br s, 1 H,  $\text{CH}_{\text{cym-e}}$ ), 5.69 – 6.10 (m, 4 H,  $\text{H}_{\text{cym}}$ ), 7.31 – 7.60 (m, 3 H,  $\text{H}_5$ ,  $\text{H}_{\text{Ar}}$ ), 7.90 (br s, 1 H,  $\text{H}_{\text{Ar}}$ ), 8.32 (br s, 1 H,  $\text{H}_{\text{Ar}}$ ) ppm, signals at 1.20, 2.30, 7.21, 7.23, 7.50 and 8.25 ppm were assigned to decomposition products.

## Stability $^1\text{H}$ NMR measurements of **8c**

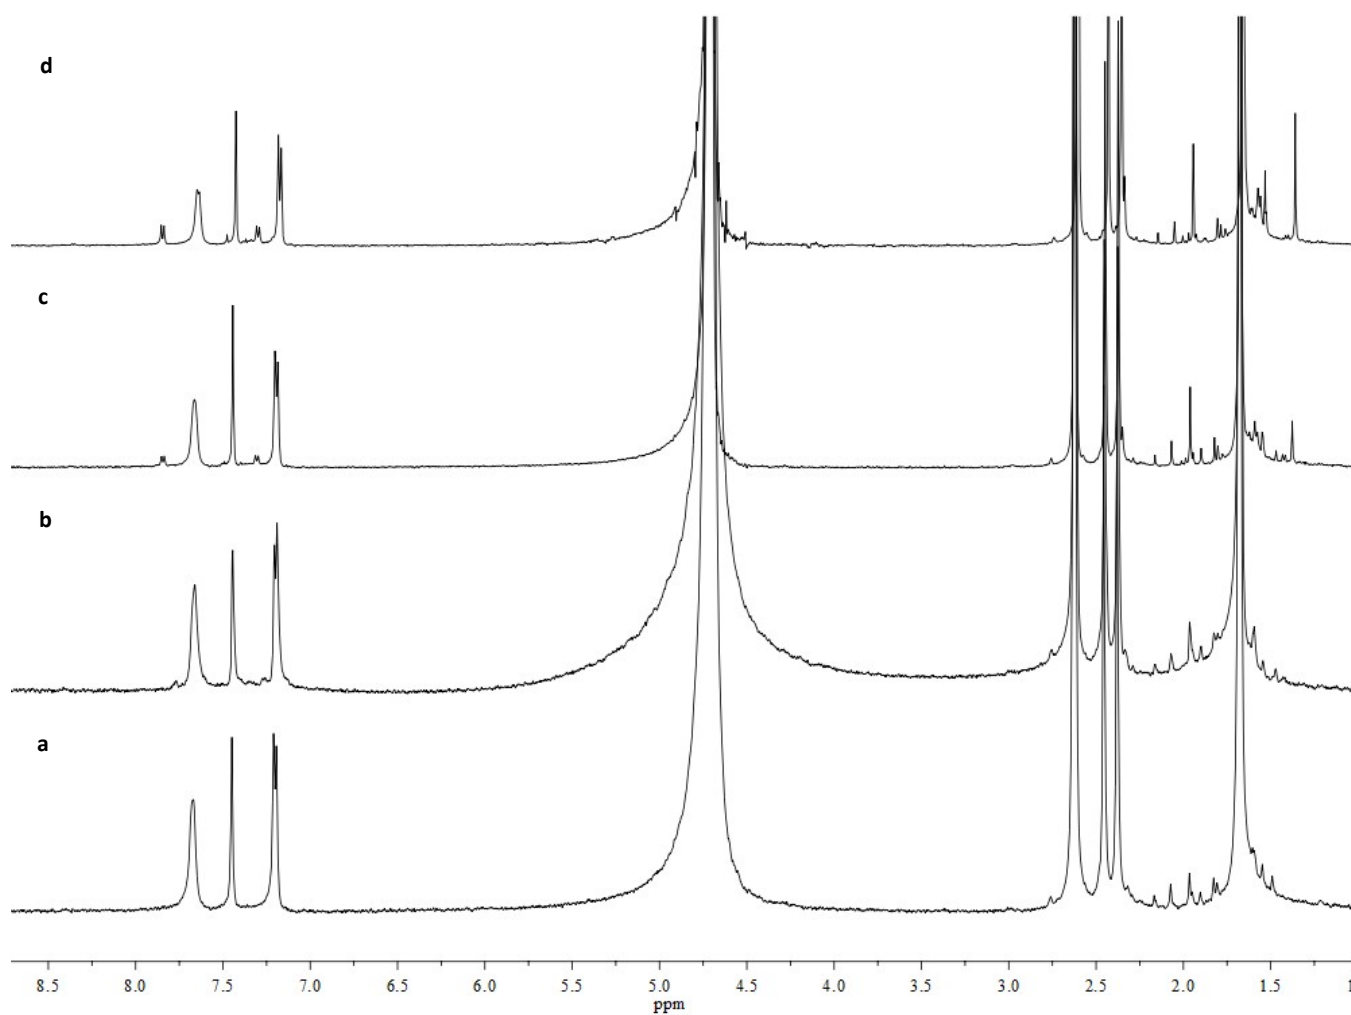

**Figure S4.** Full  $^1\text{H}$  NMR spectra of **8c** in  $\text{D}_2\text{O}$  after **a)** 5 minutes, **b)** 5 hours, **c)** 24 hours and **d)** 7 days.  $^1\text{H}$  NMR ( $\text{D}_2\text{O}$ , 500.10 MHz, 25 °C):  $\delta$  = 1.75 (s, 15 H, Cp\*), 2.45 (s, 3 H,  $-\text{CH}_3$ ), 2.53 (s, 3 H,  $-\text{CH}_3$ ), 7.27 (d,  $^3\text{J}_{\text{H,H}} = 8$  Hz, 2 H,  $\text{H}_{\text{Ar}}$ ), 7.52 (s, 1 H,  $\text{H}_5$ ), 7.75 (s, 2 H,  $\text{H}_{\text{Ar}}$ ), ppm; signals at 1.43, 2.02, 7.37 and 7.92 ppm were assigned to decomposition products.

## Stability $^1\text{H}$ NMR measurements of **7c** under exclusion of light

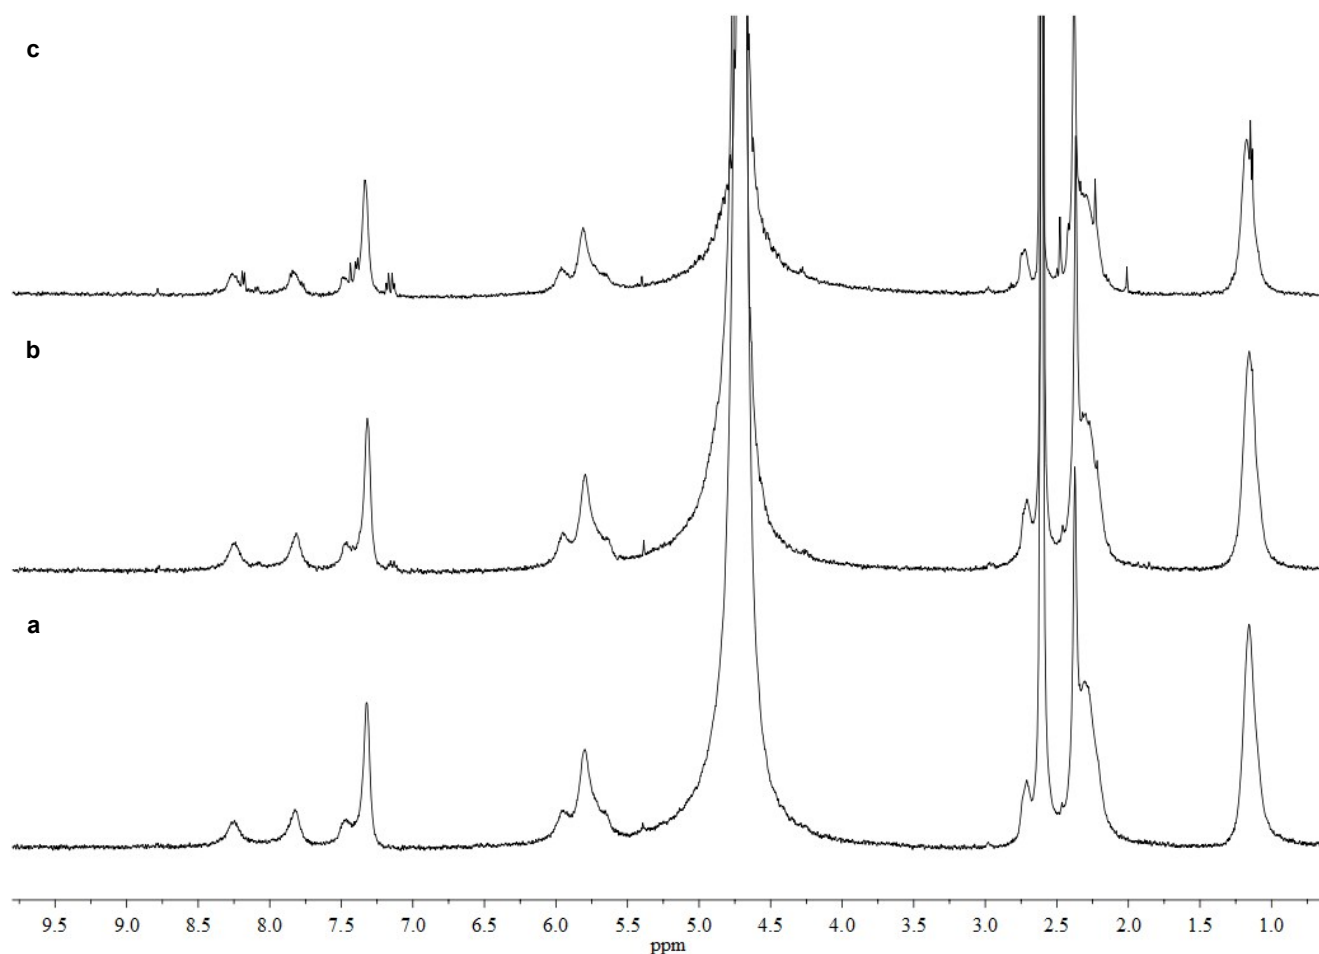

**Figure S5.** Full  $^1\text{H}$  NMR spectra of **7c** in  $\text{D}_2\text{O}$  after after **a)** 5 minutes, **b)** 24 hours and **c)** 7 days.  $^1\text{H}$  NMR ( $\text{D}_2\text{O}$ , 500.10 MHz, 25 °C):  $\delta$  = 1.23 (br s, 6 H,  $-\text{CH}_{3\text{cym-f}}$ ), 2.38 (br s, 6 H,  $-\text{CH}_3$ ), 2.45 (s, 3 H,  $-\text{CH}_3$ ), 2.78 (br s, 1 H,  $\text{CH}_{\text{cym-e}}$ ), 5.69 – 6.10 (m, 4 H,  $\text{H}_{\text{cym}}$ ), 7.31 – 7.60 (m, 3 H,  $\text{H}_{\text{Ar}}$ ), 7.90 (br s, 1 H,  $\text{H}_{\text{Ar}}$ ), 8.32 (br s, 1 H,  $\text{H}_{\text{Ar}}$ ) ppm, signals at ca. 1.22, 2.31, 7.22, 7.24, 7.50 and 8.25 ppm were assigned to decomposition products.
